# Supplementary material
Source: PubMed Central journal article supplement (PMC5328678)

**Figures**

**a.** Immunoblot showing Id1, pErk and p38 in ES cells cultured in N2B27 alone (N) or with LIF (L), LIF plus PD184352 (LP), SU5402 (LS), PS (LPS), BMP4 (LB) or BMP4 alone (B). Note that BMP does not inhibit activation of either Erk or p38 mitogen activated protein kinases.

**b,c.** **(b)** Oct4 and **(c)** Nanog immunostaining of ES cells cultured in N2B27 with LIF plus 5 $\mu$ M SU5402 or 1 $\mu$ M PD184352. Note flattened morphology of colonies.

**d.** Growth curve over five passages for Oct4GiP ES cells cultured in N2B27 supplemented with LIF plus BMP or with 3i.

**e.** qRT-PCR analysis of mRNA levels after 24 hours culture of ES cells in N2B27 only (N), serum plus LIF (GL), or N2B27 plus LIF and BMP4 (LB), PS, 3i or CHIR99021 (CHIR).

**f.** STAT3 activation is not detected in ES cells cultured in 3i. Immunoblot of phospho (tyr705)-STAT3 in ES cells cultured in N2B27 with LIF/BMP (LB) or with 3i for 24 hours (steady state), in Basal Medium (BM) for 24hrs or as BM stimulated with LIF for 20 mins (positive control).

**g.** STAT3 target gene SOCS3 is down regulated in wild type ES cells cultured in 3i.

We also found that episomal transfection with dominant negative STAT3Y705F or with the negative feedback regulator SOCS3 do not impede undifferentiated colony formation in 3i (data not shown), in contrast to their suppressive effect on LIF-mediated self-renewal<sup>2,3</sup>.

**h.** Immunoblot analyses of NDRG1 and of phosphorylated and total  $\beta$ -catenin steady state levels in ES cells cultured for 24 hours in the indicated conditions.

**i.** Ecadherin deficient ES cells maintain undifferentiated morphology and Oct4 expression in 3i.

**j.** TOPFlash activity in GSK3 $\alpha/\beta$  deficient DKO or wild-type cells cultured in N2B27 alone (non) or in the presence of PS and/or CHIR99021. Dual luciferase assays were performed 48hrs after transfection. Error bars represent standard deviation of the mean for 3 biological replicates.

**k.** CHIR99021 does not induce expression of pro-survival genes. qRT-PCR analysis of mRNA levels after 12 hours culture in N2B27 alone followed by 8 hours exposure to N2B27 alone (N) or plus CHIR99021 (CHIR). Similar results were obtained with PS or 3i.

**SUPPLEMENTARY TABLE**

Contributions to chimaeras and germ line transmission of ES cells derived and expanded in 3i

| Strain/Cell line | Embryos injected | Liveborn pups | Chimaeras | Test-mated | Transmitting    |
|------------------|------------------|---------------|-----------|------------|-----------------|
| 129/CPS1         | 64               | 16            | 12        | 8 (5♂, 3♀) | 3♀ <sup>#</sup> |
| 129/CPS2         | 21               | 5             | 4         | 3 (1♂, 2♀) | 2♀ <sup>#</sup> |
| 129/CPS3         | 20               | 15            | 11        | 4 (3♂, 1♀) | 2♂              |
| CBA/D6           | 16               | 8             | 2         | 2♀         | 2♀ <sup>#</sup> |
| CBA/D7           | 16               | 11            | 7         | 1♀         | 1♂              |

<sup>#</sup> ES cells assumed to be XX.

Chimaerism and transmission of the ES cell genome are detected by coat colour.

Chimaeras resulting from blastocyst injection of 129 ES cells were identified by the appearance of sandy and/or agouti patches amongst the black hair derived from the C57BL/6 host embryos. Adult

chimaeras exhibiting a high level of contribution from the injected ES cells were test mated with albino MF1 outbred mice. Grey progeny confirmed transmission of the 129 genome. CBA ES cells were injected into C57BL/6 embryos at the 8 cell stage. Chimaeras were identified by the presence of agouti hair. Germline transmission was ascertained by the birth of agouti pups following mating of chimaeras to mice of the C57BL/6 strain.

## SUPPLEMENTARY MATERIALS AND METHODS

### Antibody Details

|                                     | Antibody                            | Source                             | Cat. No. | Dilution (1/) |
|-------------------------------------|-------------------------------------|------------------------------------|----------|---------------|
| <b>Primary</b>                      | $\beta$ -catenin                    | BD Transduction Laboratories       | 610153   | 1000          |
|                                     | p- $\beta$ -catenin(ser33/37/thr41) | Cell signalling                    | 9561     | 1000          |
|                                     | p44/42 MAPK (ERK)                   | Cell signalling                    | 9102     | 1000          |
|                                     | p-p44/42 MAPK(thr202/tyr204)        | Cell signalling                    | 9101     | 1000          |
|                                     | AKT (PKB)                           | R and D systems                    | MAB2055  | 1000          |
|                                     | p-AKT(ser473)                       | R and D systems                    | AF887    | 1000          |
|                                     | p38                                 | Cell Signalling                    | 9212     | 1000          |
|                                     | p-p38(thr180/tyr182)                | Cell signalling                    | 9211     | 500           |
|                                     | Nanog                               | Abcam                              | ab21603  | 200           |
|                                     | Oct3/4 (c10)                        | Santa Cruz Biotechnology           | sc-5279  | 200           |
|                                     | Eed                                 | Gift from Arie Otte                |          | 10            |
|                                     | Gata4 (c-20)                        | Santa Cruz Biotechnology           | sc-1237  | 100           |
|                                     | Myc                                 | Santa Cruz Biotechnology           | sc-42    | 200           |
|                                     | NRDG1                               | Cohen laboratory <sup>4</sup>      |          | 1 $\mu$ g/ml  |
|                                     | p-NRDG1                             | Cohen laboratory <sup>4</sup>      |          | 1 $\mu$ g/ml  |
|                                     | Alpha-Tubulin                       | Abcam                              | Ab7291   | 5000          |
|                                     | Tuj1                                | Covance                            | MMS-435P | 400           |
|                                     | Stat3                               | BD Transduction Laboratories       | 610189   | 1000          |
|                                     | pStat3 (Tyr705)                     | Cell Signaling Technology          | 9131     | 1000          |
|                                     | <b>Secondary</b>                    | ECL Mouse IgG, HRP-Linked Whole Ab | Amersham | NA931         |
| ECL Rabbit IgG, HRP-Linked Whole Ab |                                     | Amersham                           | NA934    | 2000-5000     |
| Alexafluor (for IF)                 |                                     |                                    |          | 500-1000      |

### RT-PCR Primers

| Gene             | 5'-primer:               | 3'-primer:               |
|------------------|--------------------------|--------------------------|
| <i>Gapdh</i>     | CCCACTAACATCAAATGGGG     | CCTTCCACAATGCCAAAGTT     |
| <i>Nanog</i>     | ATGAAGTGCAAGCGGTGGCAGAAA | CCTGGTGGAGTCACAGAGTAGTTC |
| <i>Oct3/4</i>    | GGCGTCTCTTTGGAAAGGTGTTC  | CTCGAACCACATCCTTCTCT     |
| <i>Rex1</i>      | GACACGTGGCAAAGAAGATAGTC  | AGTGAGGCGATCCTGCTTTC     |
| <i>Sox1</i>      | CCTCGGATCTCTGGTCAAGT     | TACAGAGCCGGCAGTCATAC     |
| <i>Brachyury</i> | GTGACTGCCTACCAGAATGA     | ATTGTCCGCATAGGTTGGAG     |

## Real-Time PCR Primers

Real-time quantitative PCR was performed using the Universal Probe Library (UPL) System (Roche). Details of primers and corresponding probes are given below.

| Gene          | Forward Primer            | Reverse Primer          | Probe # |
|---------------|---------------------------|-------------------------|---------|
| <i>Actb</i>   | CTAAGGCCAACCGTGAAAAG      | ACCAGAGGCATACAGGGACA    | 64      |
| <i>Axin2</i>  | GCAGGAGCCTCACCCCTC        | TGCCAGTTTCTTTGGCTCTT    | 50      |
| <i>Bcl2</i>   | AGTACCTGAACCGGCATCTG      | GGGGCCATATAGTTCCACAAA   | 75      |
| <i>Bcl-xl</i> | TGACCACCTAGAGCCTTGGA      | TGTTCCCGTAGAGATCCACAA   | 2       |
| <i>Cdx1</i>   | ACGCCCTACGAATGGATG        | CTTGGTTCGGGTCTTACCG     | 70      |
| <i>Egr1</i>   | CCCTATGAGCACCTGACCAC      | TCGTTTGGCTGGGATAACTC    | 22      |
| <i>Fgf5</i>   | AAAACCTGGTGCACCCTAGA      | CATCACATTCCCGAATTAAGC   | 29      |
| <i>Gata4</i>  | GGAAGACACCCCAATCTCG       | CATGGCCCCACAATTGAC      | 13      |
| <i>Gata6</i>  | GGTCTCTACAGCAAGATGAATGG   | GGTCTCTACAGCAAGATGAATGG | 40      |
| <i>mcl</i>    | TAACCCAGCCATGGAAGTTT      | CAGCTTTCATTTACCCTTTG    | 33      |
| <i>Myc</i>    | CCTAGTGCTGCATGAGGAGAC     | TCTTCTCATCTTCTTGCTCTTC  | 77      |
| <i>Nanog</i>  | TTCTTGCTTACAAGGGTCTGC     | AGAGGAAGGGCGAGGAGA      | 110     |
| <i>nMyc</i>   | CCTCCGGAGAGGATACCTTG      | TCTCTACGGTGACCACATCG    | 69      |
| <i>Pou5f1</i> | GTTGGAGAAGGTGGAACCAA      | CTCCTTCTGCAGGGCTTTC     | 95      |
| <i>Rex1</i>   | TCTTCTCTCAATAGAGTGAGTGTGC | GCTTTCTTCTGTGTGCAGGA    | 71      |
| <i>Socs3</i>  | ATTTGCTTCGGGACTAGC        | AACTTGCTGTGGGTGACCAT    | 83      |
| <i>T</i>      | CAGCCCACCTACTGGCTCTA      | GAGCCTGGGGTGATGGTA      | 100     |
| <i>Tbx3</i>   | TTGCAAAGGGTTTTTCGAGAC     | TGCAGTGTGAGCTGCTTTCT    | 51      |
| <i>Tcl1</i>   | CGTGTACTTGATGAGTTTCGT     | GCAAGATCACCTGGAATTTTTC  | 71      |
| <i>Zfx</i>    | ACCGTCCGGTGCGTATAA        | TTCTCATCAGCCAGAACACCT   | 104     |

## References

1. Dani, C. et al. Paracrine induction of stem cell renewal by LIF-deficient cells: a new ES cell regulatory pathway. *Dev Biol* 203, 149-62. (1998).
2. Chambers, I. & Smith, A. Self-renewal of teratocarcinoma and embryonic stem cells. *Oncogene* 23, 7150-60 (2004).
3. Niwa, H., Burdon, T., Chambers, I. & Smith, A. Self-renewal of pluripotent embryonic stem cells is mediated via activation of STAT3. *Genes Dev* 12, 2048-60. (1998).
4. Murray, J. T. et al. Exploitation of KESTREL to identify NDRG family members as physiological substrates for SGK1 and GSK3. *Biochem J* 384, 477-88 (2004).

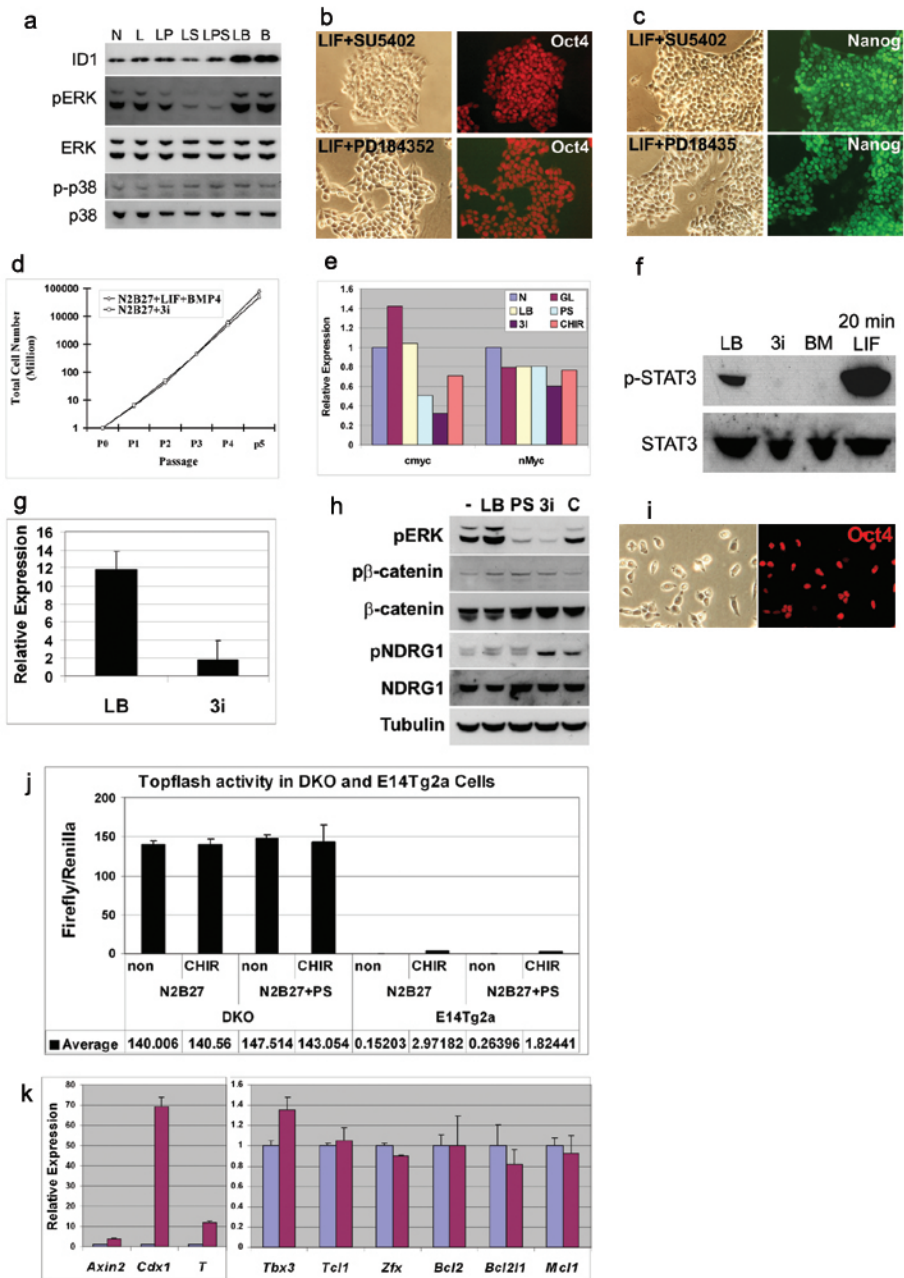

Supplement: NIHMS1550-supplement-Woodgett_embryonic_stem_cell_self_renewal_Supp-info.pdf [file NIHMS1550-supplement-Woodgett_embryonic_stem_cell_self_renewal_Supp-info.pdf]
